# Supplementary material for: Tuning particle–particle interactions to control Pickering emulsions constituents separation
Source: Royal Society of Chemistry journal article supplement (doi:10.1039/c8gc03007c), 2019-01-01
Supplement: c8gc03007c1.pdf [file c8gc03007c1.pdf]

# Supporting Information

Tuning Particle-Particle Interactions to Control Pickering Emulsions

Constituents Separation

*Faezeh Sabri, Kevin Berthomier, Chang-Sheng Wang, Louis Fradette, Jason R. Tavares and*

*Nick Virgilio\**

<sup>a</sup> Research Center for High Performance Polymer and Composite Systems (CREPEC),  
Department of Chemical Engineering, Polytechnique Montréal, Montréal, Québec, H3C 3A7,  
Canada

**Before homogenizer processing**

**After homogenizer processing**

**SP particles**

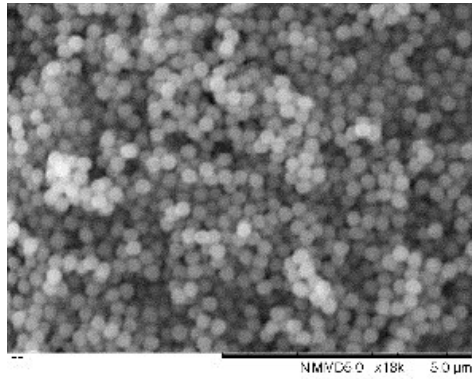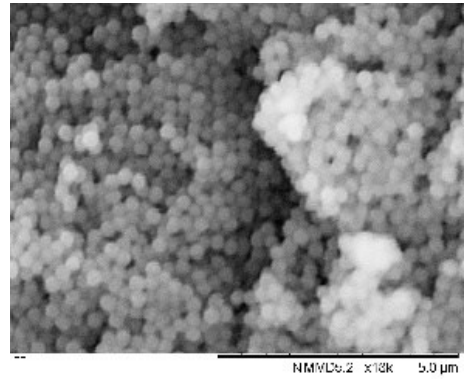

**SP-SA particles**

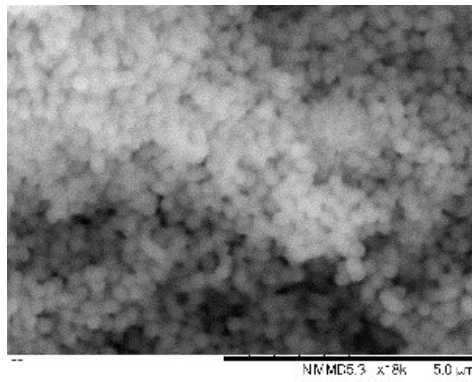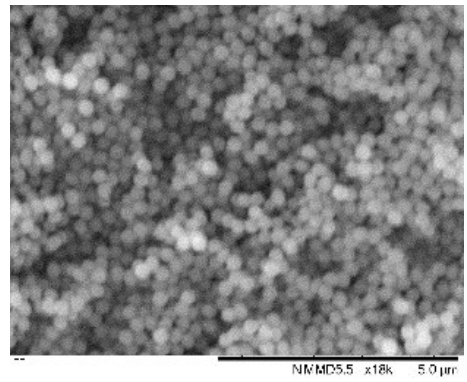

**Figure S1.** SEM micrographs of SP and SP-SA particles before and after homogenizer processing.

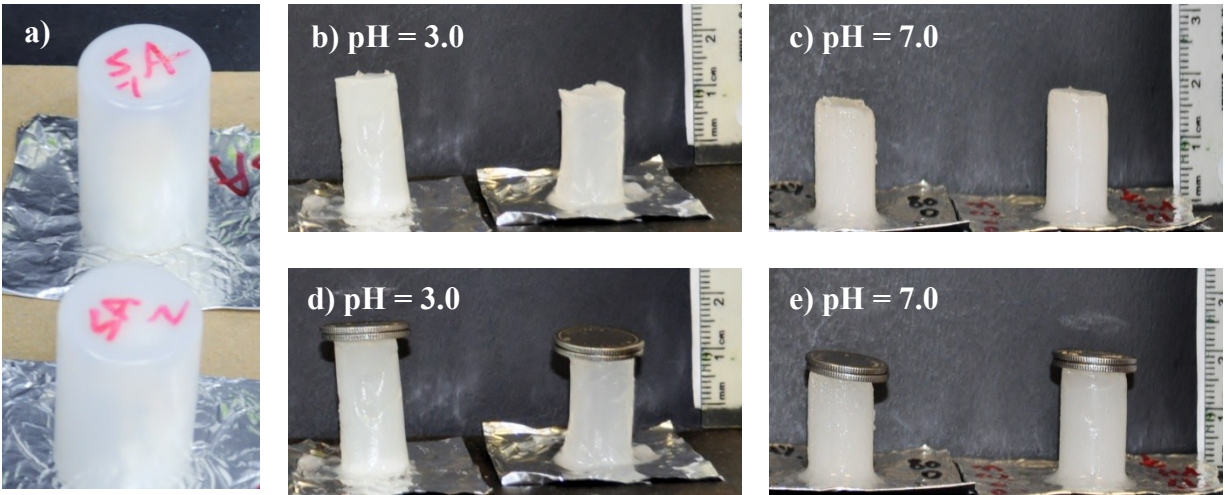

**Figure S2.** Pictures of concentrated oil-in-water Pickering emulsions comprising 4% SP-SA particles ( $\phi_o = 0.8$ ) when contained into the plastic molds (a), removed from plastic molds (b, c), and under compressive stress (d, e).

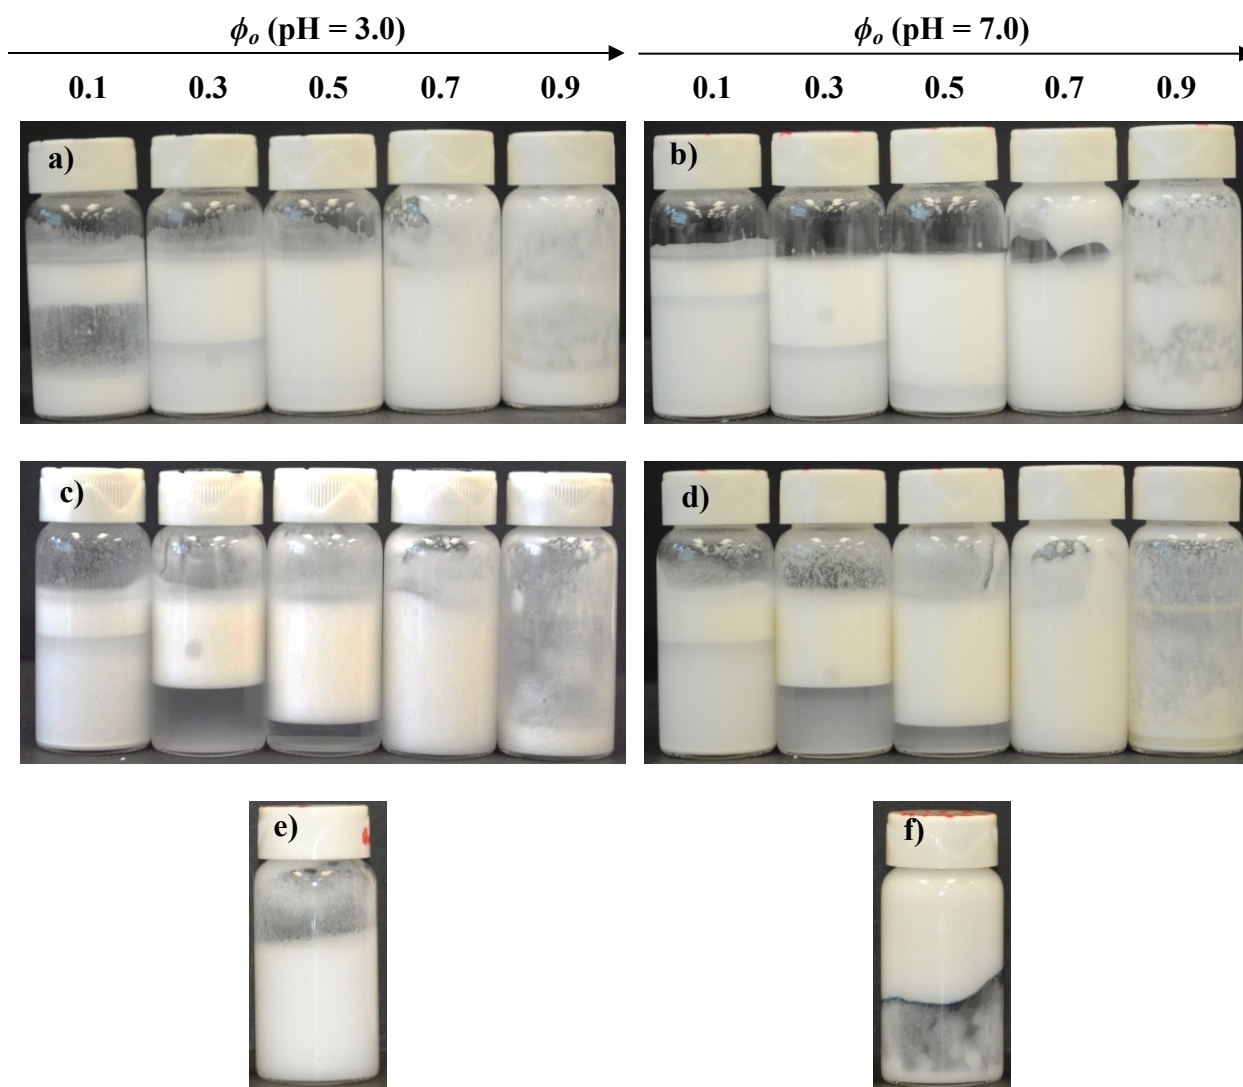

**Figure S3.** Effect of oil volume fraction  $\phi_o$  on emulsion aspect, with 4% (w/v) particles: a) and b), emulsions prepared with unmodified silica particles (SP) at pHs 3.0 and 7.0, respectively; c) and d), emulsions prepared with sodium alginate-modified particles (SP-SA), at pHs 3.0 and 7.0; e) emulsion composed of SP particles (4% w/v) at  $\phi_o = 0.8$ , compared to f) emulsion composed of SP-SA particles (4% w/v) at  $\phi_o = 0.8$ .

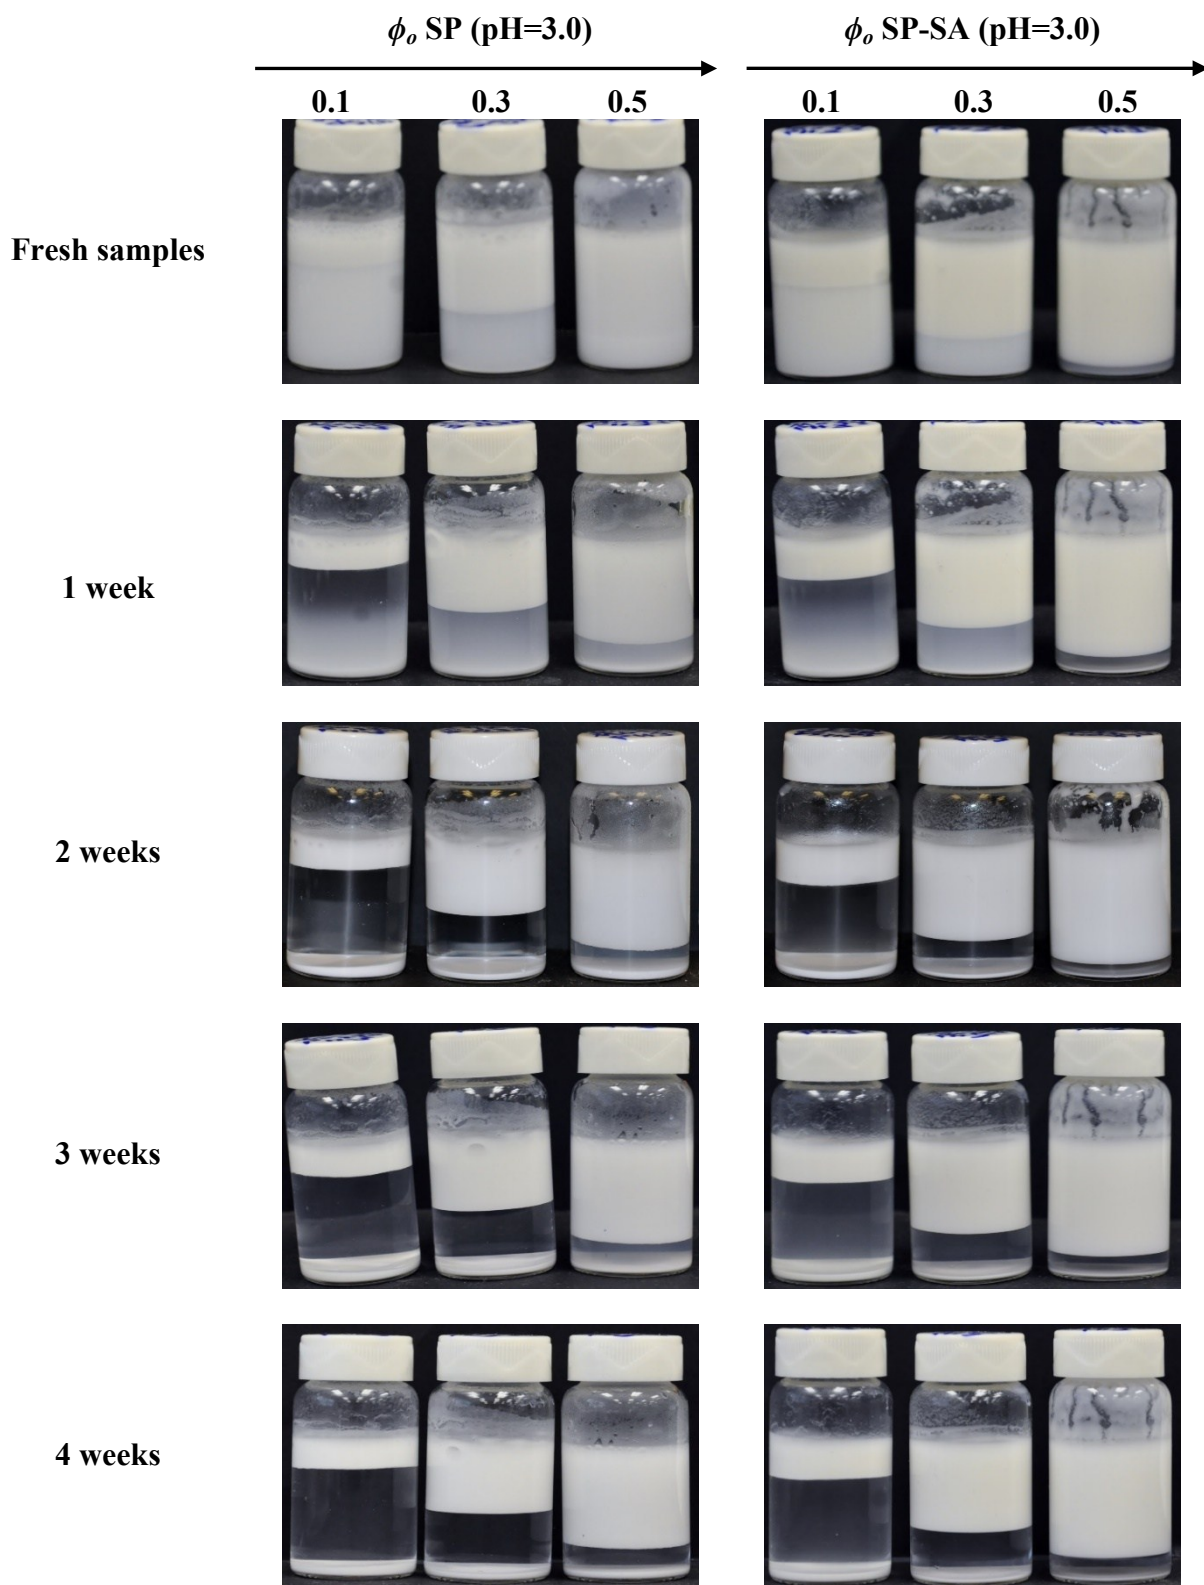

**Figure S4.** Emulsion stability in time at 3 different oil volume fractions  $\phi_o$ , and constant 4% (w/v) particles.

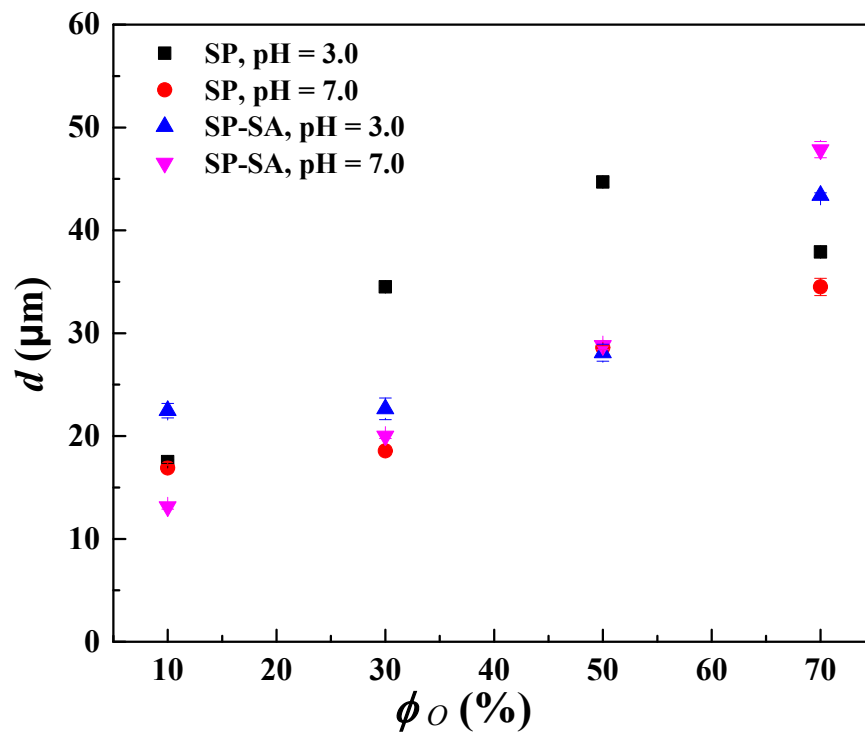

**Figure S5.** Number average diameter  $d$  of oil droplets as a function of oil volume fraction  $\phi_o$ , for both SP and SP-SA particles, at pH 3.0 and 7.0, as obtained by laser diffraction (Mastersizer).

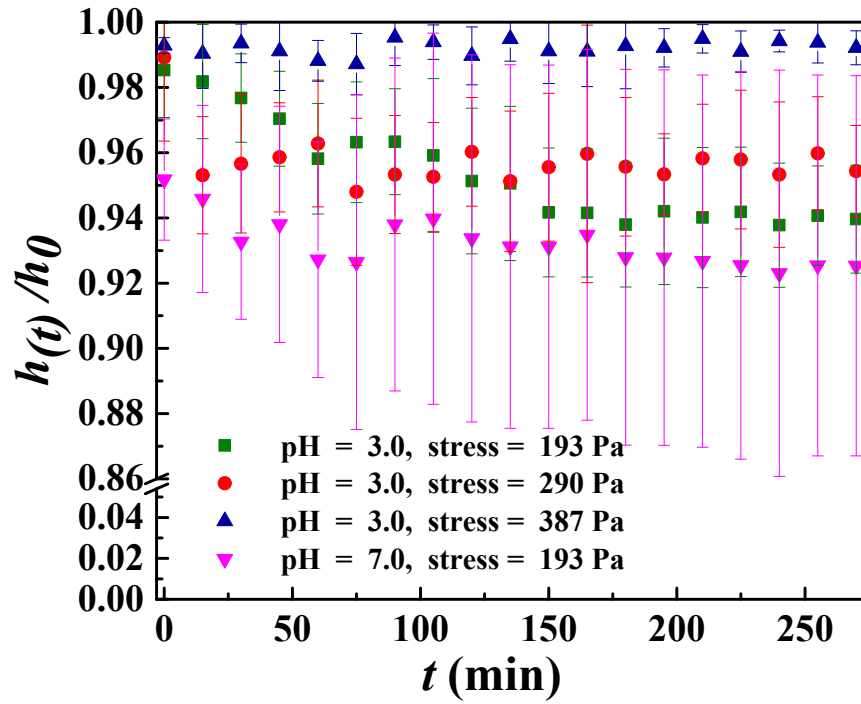

**Figure S6.** Normalized height ( $h(t)/h_0$ ) with the error bars as a function of time  $t$  and applied stress on molded concentrated emulsions ( $\phi_o = 0.8$ ) comprising 4% SP or SP-SA particles, at pH 3.0 and 7.0.

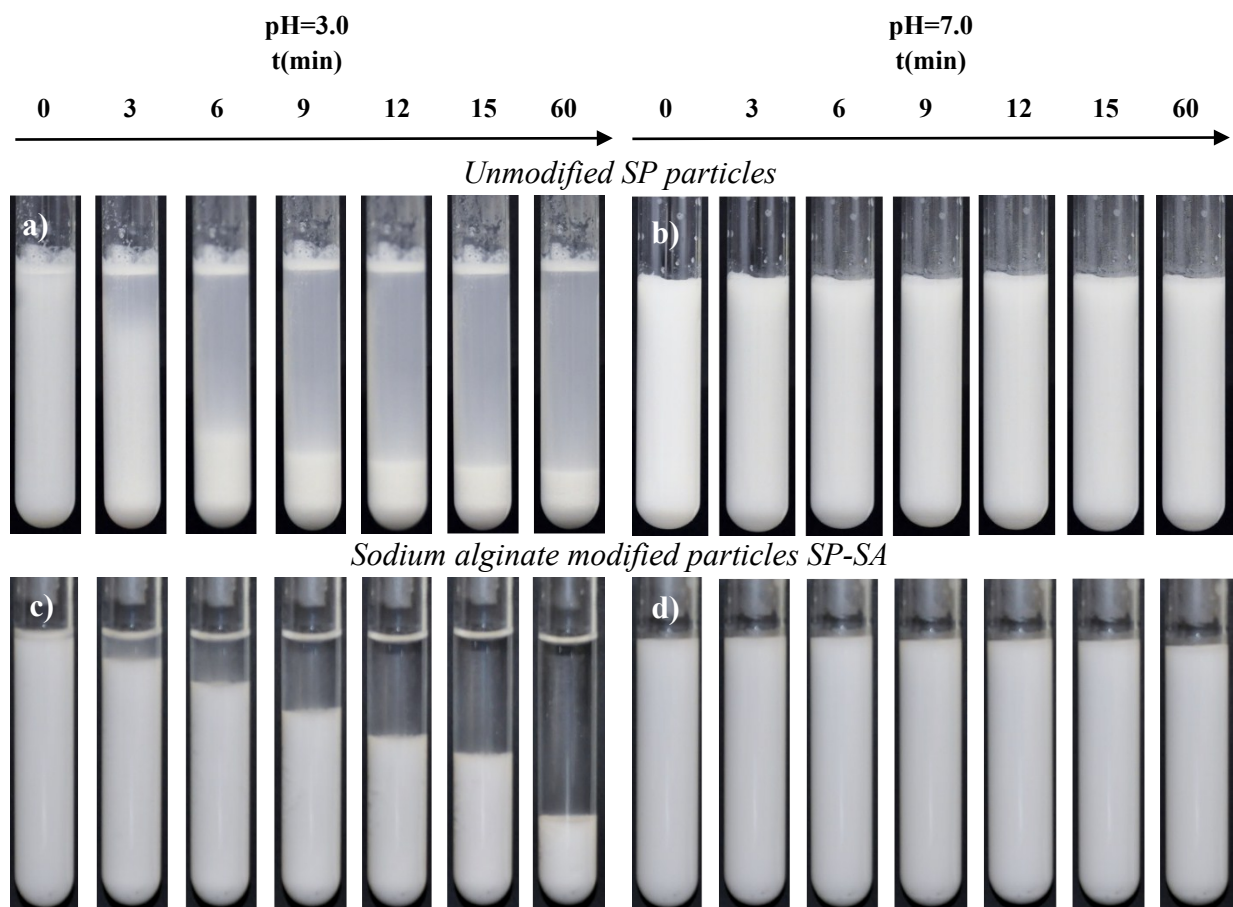

**Figure S7.** Pictures of the particle's behavior during sedimentation in water (height of test tube = 15.3 cm) for SP (a, b) and SP-SA (c, d), over 60 min at pHs 3.0 and 7.0.



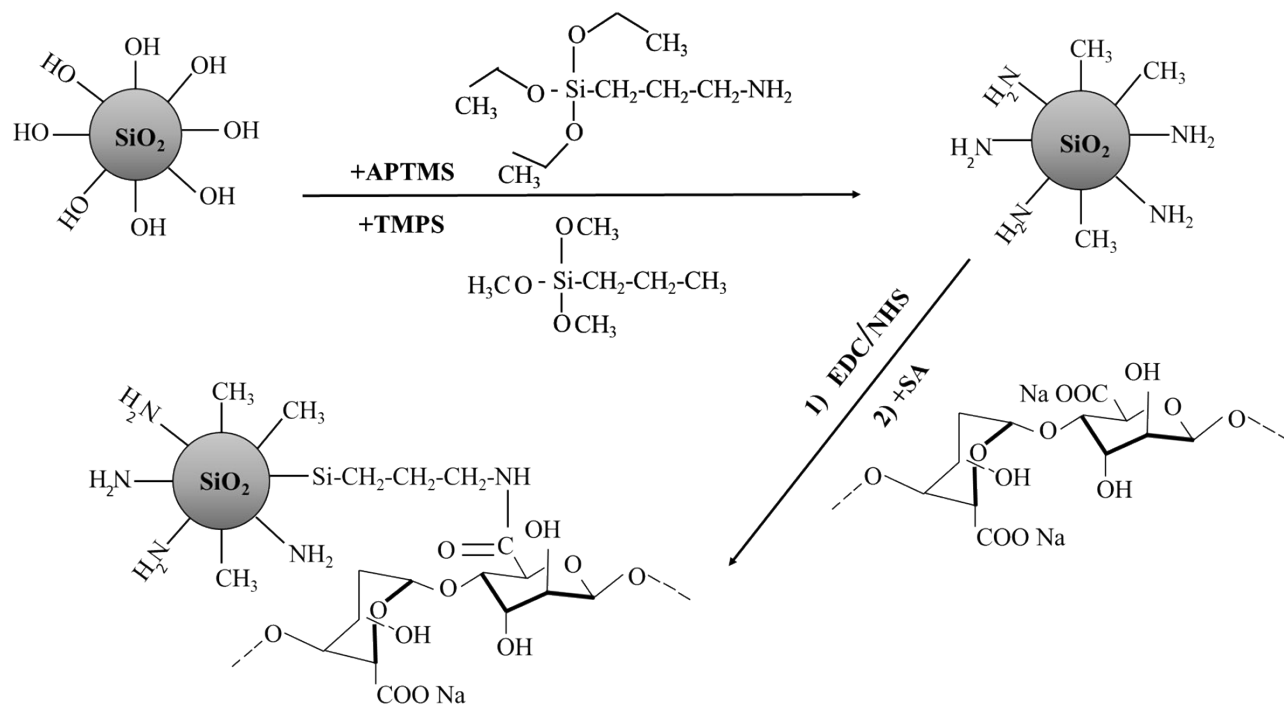

**Scheme S1** Reaction Schemes to modify SP particles with APTMS, TMPS and SA molecules respectively
